# Supplementary material for: Chemical Variability of Peel and Leaf Essential Oils in the Citrus Subgenus Papeda (Swingle) and Few Relatives
Source: MDPI journal article supplement (doi:10.3390/plants10061117), 2021-05-31
Supplement: s1 [file s1]

## Supplementary Materials

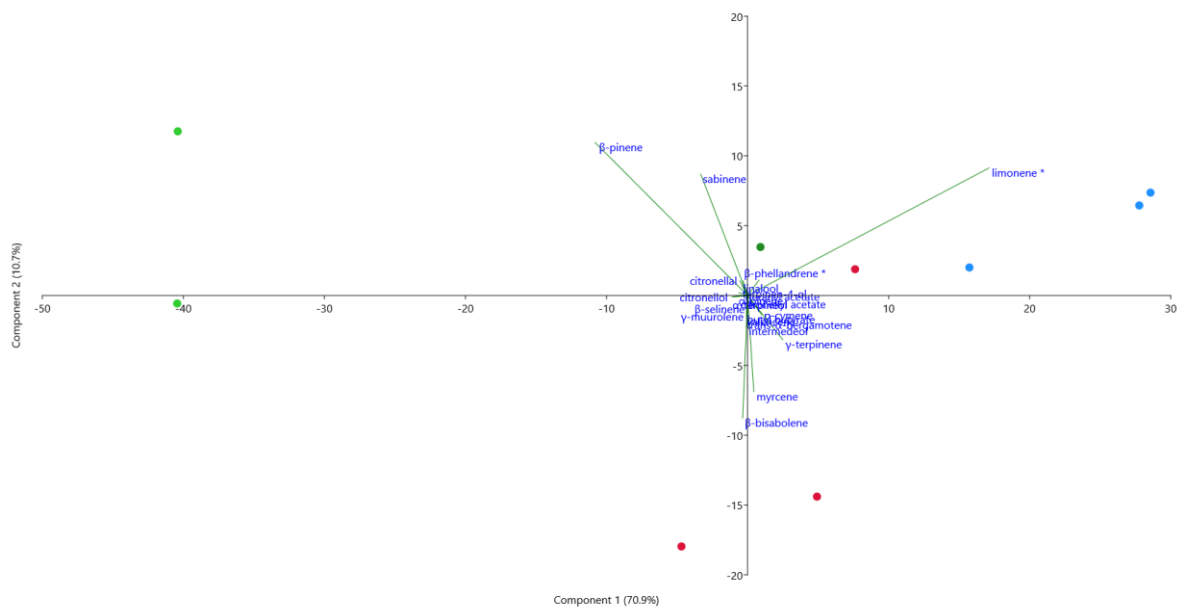

**Figure S1.** Variable contributions in PCA of peel oils. Green: hys: *C. hystrix*, mic: *C. micrantha*, mapt: *C. macroptera*; Red: lat: *C. latipes*, ich: *C. ichangensis*; Blue: wil: *C. wilsonii*, jun: *C. junos*, maph: *C. macrophylla*.

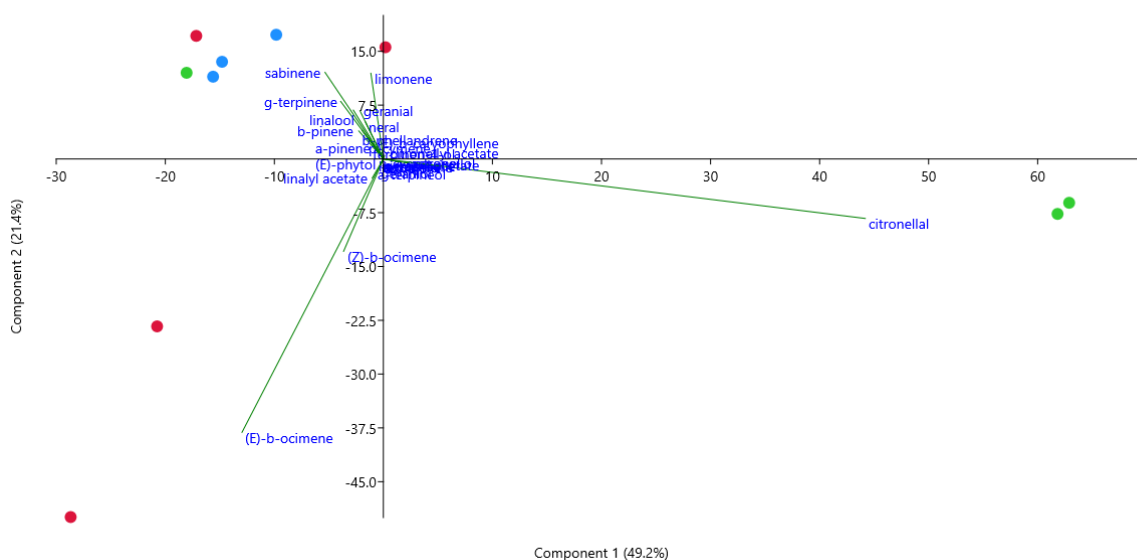

**Figure S2.** Variable contributions in PCA of leaf oils. Green: hys: *C. hystrix*, mic: *C. micrantha*, mapt: *C. macroptera*; Red: lat: *C. latipes*, ich: *C. ichangensis*; Blue: wil: *C. wilsonii*, jun: *C. junos*, maph: *C. macrophylla*.
